# Supplementary material for: TJP1 Contributes to Tumor Progression through Supporting Cell-Cell Aggregation and Communicating with Tumor Microenvironment in Leiomyosarcoma
Source: PubMed Central journal article supplement — Mol Cells. 2021 Nov 12;44(11):784–94. doi: 10.14348/molcells.2021.0130 (PMC8627839; doi:10.14348/molcells.2021.0130), 2021-11-12
Supplement: molce-44-11-784-supple.pdf [file molce-44-11-784-supple.pdf]

**Supplementary Table S1.**  $^{18}\text{F}$ -FDG PET/CT SUV Uptake according to PET/CT

| Injected            | SUV-9w (SUV-max)       | SUV-12w (SUV-max)                        |
|---------------------|------------------------|------------------------------------------|
| Placebo             | -                      | -                                        |
| SK-LMS-1            | -                      | Right rear leg (3.556)                   |
| SK-LMS-1            | Right rear leg (1.969) | Right rear leg (4.264)                   |
| SK-LMS-1 sh-Control | -                      | -                                        |
| SK-LMS-1 sh-Control | -                      | Right rear leg (3.653)                   |
| SK-LMS-1 sh-Control | Right rear leg (3.129) | Right rear leg (3.438)                   |
| SK-LMS-1 sh-Control | -                      | Right rear leg/Head (skin) (4.188/2.763) |
| SK-LMS-1 sh-TJP1    | -                      | -                                        |
| SK-LMS-1 sh-TJP1    | -                      | -                                        |
| SK-LMS-1 sh-TJP1    | -                      | Head (4.525)                             |
| SK-LMS-1 sh-TJP1    | Lung (1.281)           | -                                        |

**Supplementary Table S2.** Primer information for RT-PCR

| Gene      | Sequence(5'-3')      | Genebank Accession No. |
|-----------|----------------------|------------------------|
| TJP1 - F  | GGAGAGGTGTTCCGTGTTGT | NM_003257              |
| TJP1 - R  | GAGCGGACAAATCCTCTCTG | NM_003257              |
| CSF1 - F  | GCCCCGTTTAACTCCGTTT  | NM_000757              |
| CSF1 - R  | CGCCTCCACCTGTAGAACAA | NM_000757              |
| GAPDH - F | GGGTGTGAACCATGAGAAGT | NM_001289745           |
| GAPDH - R | GACTGTGGTCATGAGTCCT  | NM_001289745           |

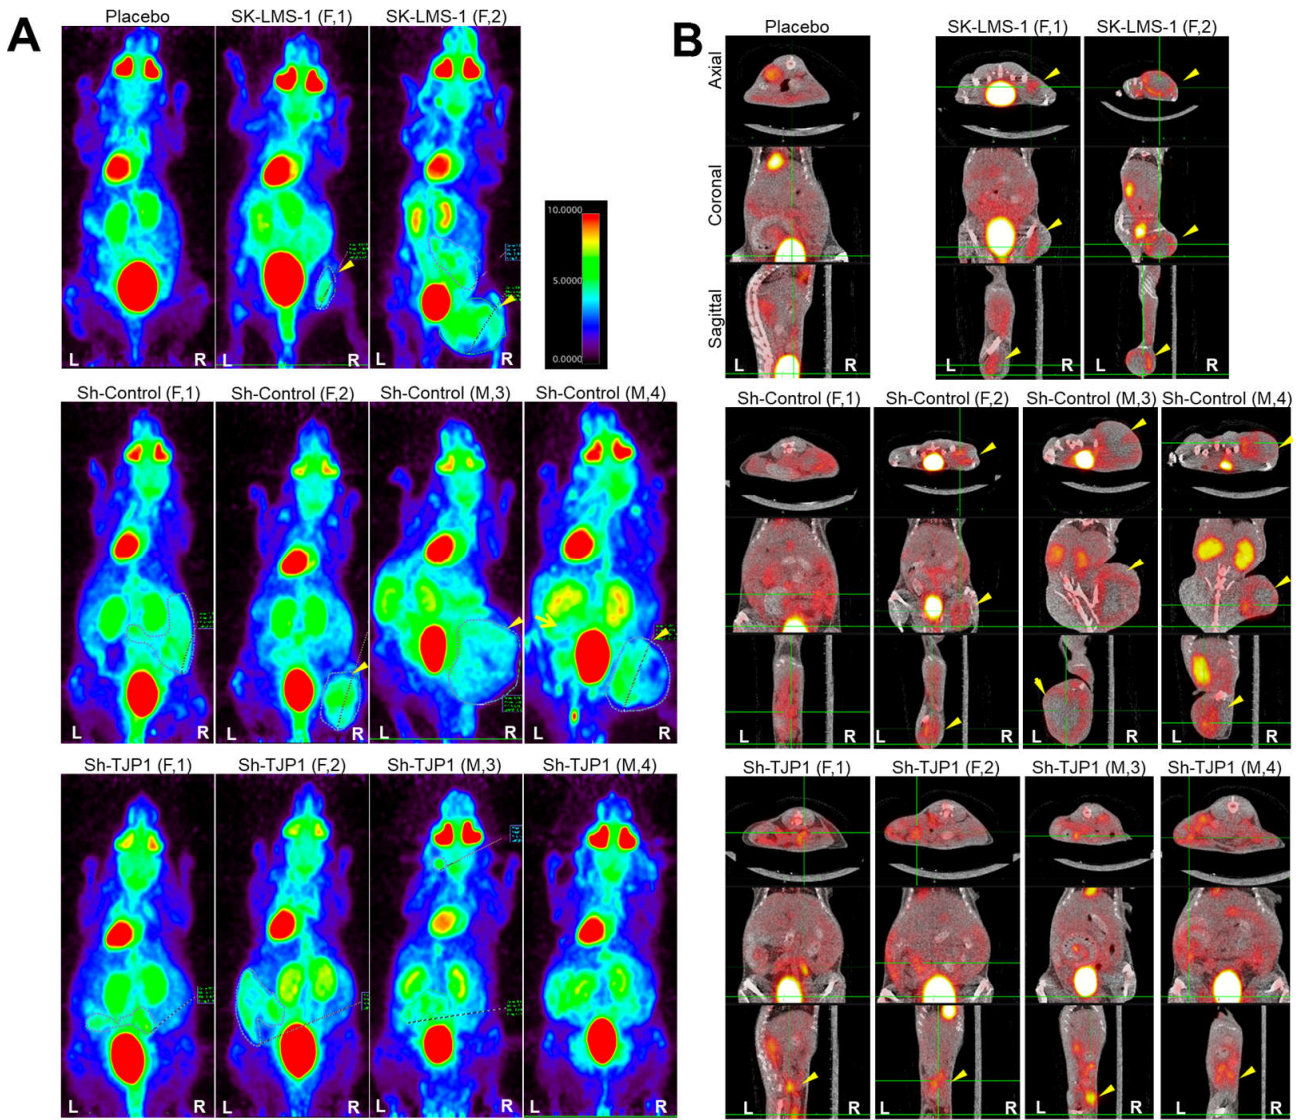

**Supplementary Fig. S1. <sup>18</sup>F-FDG-PET/CT scan of LMS xenograft models.** Mice (21 weeks old) were subjected to PET-CT imaging analysis for tumor detection at 12th week after transplantation of LMS cells or PBS orthotopically. PET (A) and CT (B) images from mice were arranged. Arrowheads (yellow) point out orthotopic tumor growth. L, left; R, right; M, male; F, female. The results were shown as the representative of three independent experiments.

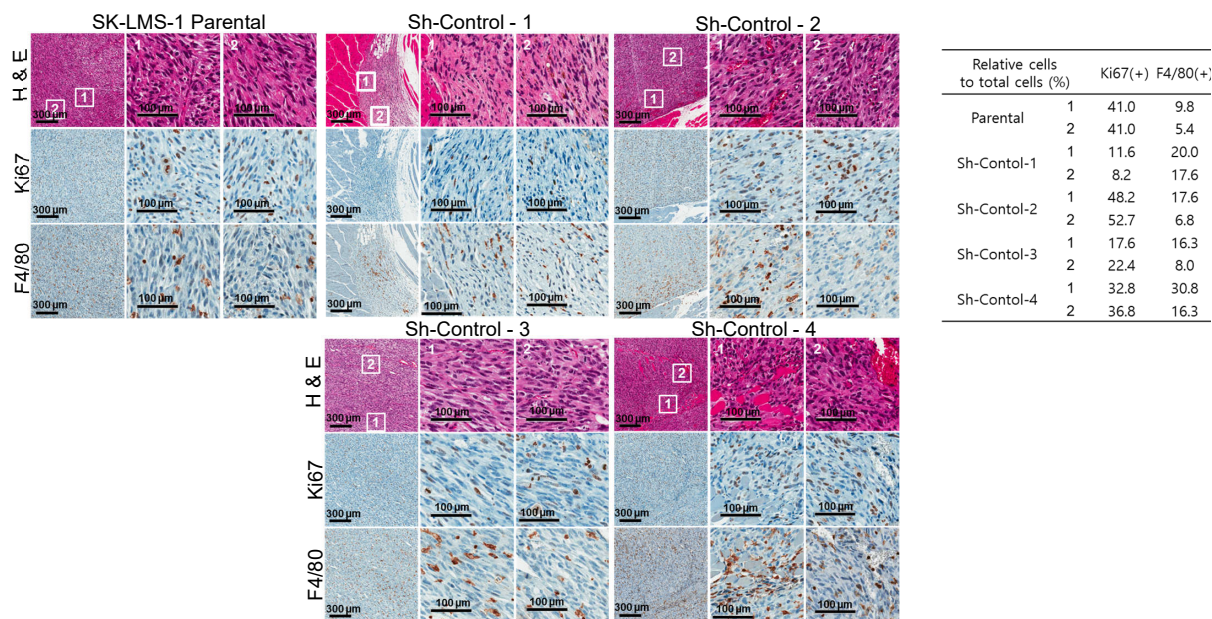

Supplementary Fig. S2. Immunohistochemistry of LMS tumors from animal model with antibodies against Ki67 and F4/80.

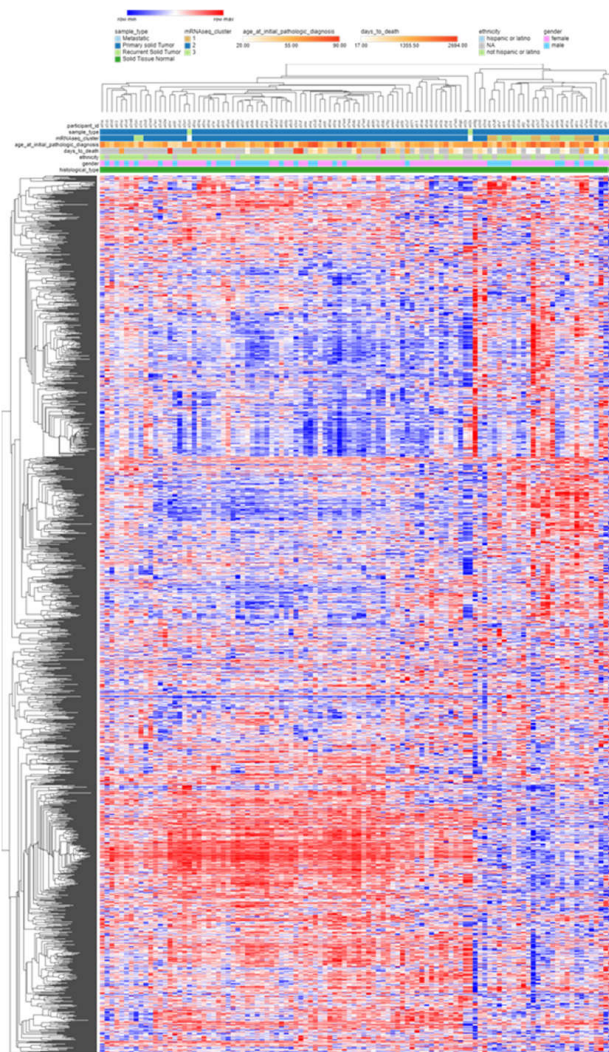

Supplementary Fig. S3. Hierarchical clustering of TCGA LMS Transcriptome.
